# Supplementary material
Source: MDPI journal article supplement (https://www.mdpi.com/2073-4441/15/8/1558)
Supplement: s1 [file s1]

## Supplementary materials for "Projection of future meteorological droughts in Lake Urmia Basin, Iran"

Babak Ghazi <sup>1\*</sup>, Sanjana Dutt <sup>2</sup> Ali Torabi Haghighi <sup>3</sup>

<sup>1</sup> Department of Meteorology and Climatology, Faculty of Earth Sciences and Spatial Management, Nicolaus Copernicus University in Toruń, Poland, Jurija Gagarina 11, 87-100 Toruń, babak.ghazi@doktorant.umk.pl

<sup>2</sup> Department of Geomatics and Cartography, Faculty of Earth Sciences and Spatial Management, Nicolaus Copernicus University in Toruń, Jurija Gagarina 11, 87-100 Toruń, Poland, Sanjana.dutt@doktorant.umk.pl

<sup>3</sup> Water, Energy, and Environmental Engineering Research Unit, University of Oulu, Pentti Kaiteran katu 1, P.O.Box 8000, , Oulu, 90014, Finland: Ali.TorabiHaghighi@oulu.fi

\* Corresponding author: Babak Ghazi, babak.ghazi@doktorant.umk.pl

Equation S1:

Calculation SPI values:

Using precipitation data over a long-term period, the SPI is calculated in a specific location using a probability distribution and a normal distribution. A gamma probability density function is used to describe the frequency distribution of precipitation when estimating the SPI.

$$P(x) = \frac{1}{\beta^\alpha \Gamma(\alpha)} x^{\alpha-1} e^{-x/\beta} \text{ where } x > 0$$

where  $x$  is precipitation values,  $\alpha$  is a shape parameter,  $\beta$  is a scale parameter, and the gamma function is expressed as:

$$\Gamma(\alpha) = \int_0^\infty x^{\alpha-1} e^{-x} dx$$

To estimate  $\alpha$  and  $\beta$  with optimal values maximum likelihood methods as follow is used:

$$\hat{\alpha} = \frac{1}{4A} \left( 1 + \sqrt{1 + \frac{4A}{3}} \right)$$

$$\hat{\beta} = \frac{\bar{x}}{\hat{\alpha}}$$

$$A = \ln(\bar{x}) - \frac{\sum \ln(x)}{n}$$

where  $n$  denotes the number of precipitation, and  $\bar{x}$  is the average precipitation. The cumulative probability for a specific month then can be calculated from:

$$G = \int_0^x g(x) dx = \frac{1}{\beta^\alpha \Gamma(\alpha)} \int_0^x x^{\alpha-1} e^{-x/\beta} dx$$

Setting  $t = \frac{x}{\beta}$  the incomplete gamma function can be calculated from:

$$G(x) = \frac{1}{\Gamma(\alpha)} \int_0^{\frac{x}{\beta}} t^{\alpha-1} e^{-t} dt$$

It is possible to have several zero values in a sample set. In order to account for zero values, the cumulative probability function for gamma distribution is modified as:

$$H=q+(1-q)G(x)$$

where  $q$  and  $(1-q)$  are the probability of zero and non-zero precipitation, respectively. The SPI values are then obtained from the cumulative probability:

for  $0.5 < H < 1$ :

$$SPI = +\left(k - \frac{c_0 + c_1 \times k + c_2 \times k^2}{1 + d_1 \times k + d_2 \times k^2 + d_3 \times k^3}\right), \quad K = \sqrt{\ln\left(\frac{1}{(1-H)^2}\right)}$$

for  $0 < H < 0.5$ :

$$SPI = -\left(k - \frac{c_0 + c_1 \times k + c_2 \times k^2}{1 + d_1 \times k + d_2 \times k^2 + d_3 \times k^3}\right), \quad K = \sqrt{\ln\left(\frac{1}{H^2}\right)}$$

where  $c_0=2.5155$ ,  $c_1=0.8028$ ,  $c_2=0.0103$ ,  $d_1=1.4327$ ,  $d_2=0.1892$ , and  $d_3=0.0013$  [1–3].

Table S1: Comparison of SPI values frequency for Historical reference period, SSP1-2.6 and SSP5-8.5 scenarios in Lake Urmia Basin.

|                | Mahabad    |          |          |
|----------------|------------|----------|----------|
|                | Historical | SSP1-2.6 | SSP5-8.5 |
| Extremely wet  | 4          | 20       | 7        |
| Very wet       | 48         | 48       | 62       |
| Moderately wet | 73         | 110      | 106      |
| Near Normal    | 507        | 678      | 690      |
| Moderately dry | 91         | 109      | 92       |
| Severely dry   | 32         | 42       | 36       |
| Extremely dry  | 19         | 19       | 33       |

|                | Maragheh   |          |          |
|----------------|------------|----------|----------|
|                | Historical | SSP1-2.6 | SSP5-8.5 |
| Extremely wet  | 12         | 20       | 10       |
| Very wet       | 30         | 52       | 47       |
| Moderately wet | 96         | 103      | 125      |
| Near Normal    | 501        | 685      | 680      |
| Moderately dry | 84         | 102      | 94       |
| Severely dry   | 27         | 42       | 41       |
| Extremely dry  | 24         | 22       | 29       |

|                | Saqqez     |          |          |
|----------------|------------|----------|----------|
|                | Historical | SSP1-2.6 | SSP5-8.5 |
| Extremely wet  | 6          | 23       | 10       |
| Very wet       | 39         | 48       | 51       |
| Moderately wet | 91         | 98       | 104      |
| Near Normal    | 491        | 682      | 698      |
| Moderately dry | 101        | 114      | 90       |
| Severely dry   | 33         | 44       | 42       |
| Extremely dry  | 13         | 17       | 31       |

|                | Sarab      |          |          |
|----------------|------------|----------|----------|
|                | Historical | SSP1-2.6 | SSP5-8.5 |
| Extremely wet  | 12         | 25       | 15       |
| Very wet       | 33         | 42       | 48       |
| Moderately wet | 99         | 91       | 80       |
| Near Normal    | 490        | 701      | 713      |
| Moderately dry | 85         | 88       | 89       |
| Severely dry   | 33         | 54       | 46       |
| Extremely dry  | 22         | 25       | 35       |

|                | Tabriz     |          |          |
|----------------|------------|----------|----------|
|                | Historical | SSP1-2.6 | SSP5-8.5 |
| Extremely wet  | 8          | 21       | 15       |
| Very wet       | 30         | 49       | 59       |
| Moderately wet | 98         | 101      | 93       |
| Near Normal    | 525        | 688      | 688      |
| Moderately dry | 62         | 100      | 103      |
| Severely dry   | 26         | 46       | 42       |
| Extremely dry  | 25         | 21       | 26       |

|                | Takab      |          |          |
|----------------|------------|----------|----------|
|                | Historical | SSP1-2.6 | SSP5-8.5 |
| Extremely wet  | 11         | 22       | 8        |
| Very wet       | 32         | 45       | 43       |
| Moderately wet | 60         | 94       | 113      |
| Near Normal    | 518        | 689      | 699      |
| Moderately dry | 96         | 102      | 90       |
| Severely dry   | 40         | 55       | 40       |
| Extremely dry  | 17         | 19       | 33       |

|                 | Urmia      |          |          |
|-----------------|------------|----------|----------|
|                 | Historical | SSP1-2.6 | SSP5-8.5 |
| Extremely wet   | 6          | 17       | 14       |
| Very wet        | 38         | 66       | 56       |
| sModerately wet | 82         | 91       | 111      |
| Near Normal     | 516        | 689      | 694      |
| Moderately dry  | 80         | 101      | 91       |
| Severely dry    | 30         | 45       | 36       |
| Extremely dry   | 22         | 17       | 24       |
